# Supplementary material for: Resting-State Isolated Effective Connectivity of the Cingulate Cortex as a Neurophysiological Biomarker in Patients with Severe Treatment-Resistant Schizophrenia
Source: MDPI journal article supplement (doi:10.3390/jpm10030089), 2020-08-14
Supplement: s1 [file s1]

**Table S1.** MNI coordinates.

| Seed ROIs                        |   | MNI coordinates |     |    |
|----------------------------------|---|-----------------|-----|----|
|                                  |   | x               | y   | z  |
| posterior cingulate cortex (PCC) | L | -10             | -45 | 24 |
|                                  | R | 9               | -45 | 24 |
| anterior cingulate cortex (ACC)  | L | -5              | 1   | 32 |
|                                  | R | 5               | 5   | 31 |

Montreal Neurological Institute (MNI) coordinates in the present study were based on previous articles [Park 2009, Moreines 2017, Lacadie 2008].

**Table S2.** Summary of significant results of 4-way ANOVA.

| Analysis                                                                                    | Results                         |
|---------------------------------------------------------------------------------------------|---------------------------------|
| <b>4-way ANOVA</b>                                                                          |                                 |
| Main effects                                                                                |                                 |
| frequency                                                                                   | $F_{5, 225} = 34.39, p < 0.001$ |
| Interactions                                                                                |                                 |
| frequency-by-directionality                                                                 | $F_{5, 225} = 3.113, p = 0.010$ |
| laterality-by-directionality-by-group                                                       | $F_{1, 45} = 6.619, p = 0.013$  |
| frequency-by-laterality-by-directionality-by-group                                          | $F_{5, 225} = 3.497, p = 0.005$ |
| <b>3-way ANOVA (Left)</b>                                                                   |                                 |
| Main effects                                                                                |                                 |
| frequency                                                                                   | $F_{5, 225} = 22.20, p < 0.001$ |
| Interactions                                                                                |                                 |
| directionality-by-group                                                                     | $F_{1, 45} = 4.413, p = 0.041$  |
| frequency-by-directionality                                                                 | $F_{5, 225} = 3.369, p = 0.006$ |
| <b>2-way ANOVA (Left, delta frequency)</b>                                                  |                                 |
| Interactions                                                                                |                                 |
| frequency-by-laterality                                                                     | $F_{5, 225} = 3.391, p = 0.006$ |
| <b>Post-hoc independent t-tests for the ratio of directionality between the PCC and ACC</b> |                                 |
| Delta band in the left side                                                                 | $t_{45} = 7.659, p = 0.008$     |
| Theta band in the left side                                                                 | $t_{45} = 8.066, p = 0.007$     |
